# Supplementary material for: Acting against your own interests: The tension between emotion regulation preference and efficacy and its implications for individuals with depressive symptoms
Source: PLoS One. 2021 Jul 12;16(7):e0254213. doi: 10.1371/journal.pone.0254213 (PMC8274863; doi:10.1371/journal.pone.0254213)
Supplement: S1 Dataset — (XLSX) [file pone.0254213.s001.xlsx]

## Sheet: S1. Data Set_Experiment 1A
ID	Gender	Age	Education	Depression	ChoiceDistraction_Low	ChoiceDistraction_High	ChoiceReappraisal_Low	ChoiceReappraisal_High	State Anxiety	Trait Anxiety
1	1	23	13	0	0	13.33	100	86.67	24	21
2	1	21	12	7	0	40	100	60	30	39
3	1	20	12	8	13.33	66.67	86.67	33.33	26	30
4	1	34	17	2	46.67	13.33	53.33	86.67	31	35
5	1	26	12	25	6.67	60	93.33	40	40	55
6	1	22	12	7	40	20	60	80	35	31
7	1	34	17	15	0	73.33	100	26.67	50	46
8	0	39	16	0	53.33	80	46.67	20	28	26
9	1	25	17	5	60	53.33	40	46.67	41	31
10	1	23	12	7	33.33	60	66.67	40	33	34
11	1	45	15	1	6.67	66.67	93.33	33.33	29	24
12	1	20	12	7	46.67	40	53.33	60	45	43
13	1	34	18	2	33.33	86.67	66.67	13.33	21	28
14	1	22	12	30	6.67	73.33	93.33	26.67	55	68
15	1	26	15	12	0	53.33	100	46.67	47	35
16	1	34	16	5	6.67	6.67	93.33	93.33	53	48
17	1	27	16	0	13.33	86.67	86.67	13.33	24	22
18	1	22	12	4	40	86.67	60	13.33	41	45
19	1	23	12	12	20	46.67	80	53.33	26	26
20	1	23	12	3	13.33	53.33	86.67	46.67	29	28
21	1	21	12	3	13.33	73.33	86.67	26.67	26	28
22	1	22	12	14	0	46.67	100	53.33	41	48
23	0	22	12	0	0	6.67	100	93.33	20	21
24	1	23	12	9	13.33	53.33	86.67	46.67	38	41
25	1	20	12	4	20	73.33	80	26.67	31	33
26	0	24	12	1	0	33.33	100	66.67	23	22
27	1	20	12	9	40	6.67	60	93.33	49	51
28	1	45	20	6	0	33.33	100	66.67	27	30
29	1	31	18	0	40	66.67	60	33.33	20	24
30	1	21	13	1	0	73.33	100	26.67	34	33
31	1	20	13	5	6.67	40	93.33	60	25	26
32	1	23	12	0	13.33	6.67	86.67	93.33	21	23
33	1	20	12	8	46.67	73.33	53.33	26.67	33	29
34	1	27	13	13	26.67	80	73.33	20	42	54
35	1	23	12	13	33.33	60	66.67	40	50	54
36	1	22	13	13	53.33	40	46.67	60	56	44
37	1	24	16	3	40	80	60	20	31	31
38	1	22	12	6	60	93.33	40	6.67	31	40
39	1	29	16	3	26.67	66.67	73.33	33.33	40	40
40	1	20	12	11	13.33	13.33	86.67	86.67	50	49
41	0	25	13	10	33.33	73.33	66.67	26.67	60	58
42	0	21	12	14	0	53.33	100	46.67	44	51
43	1	24	13	9	0	46.67	100	53.33	32	27
44	1	23	13	7	13.33	66.67	86.67	33.33	31	25
45	0	23	12	20	6.67	66.67	93.33	33.33	44	56
46	0	23	15	15	40	33.33	60	66.67	37	48
47	1	23	14	7	6.67	80	93.33	20	39	40
48	0	26	13	6	20	73.33	80	26.67	23	24
49	1	23	13	20	53.33	86.67	46.67	13.33	64	57
50	0	36	13	9	46.67	53.33	53.33	46.67	43	30
51	0	32	15	4	13.33	80	86.67	20	34	34
52	0	25	14	11	13.33	73.33	86.67	26.67	55	53
53	1	22	12	15	33.33	80	66.67	20	53	52
54	1	21	13	7	40	66.67	60	33.33	39	46
55	1	21	12	7	26.67	46.67	73.33	53.33	29	32
56	0	29	16	4	13.33	80	86.67	20	53	44
57	0	20	13	3	13.33	73.33	86.67	26.67	26	37
58	1	26	19	3	33.33	80	66.67	20	43	43
